# Supplementary material for: Longitudinal study of sustainable acceleration of immunosenescence and immunoactivation dependent on SIV replication stress in SIVmac239-infected rhesus macaques
Source: Research Square preprint supplement (doi:10.21203/rs.3.rs-208517/v1), 2021-03-01
Supplement: Supplementary file 1 [file 79d39f8fa4da6440d5cfecc7.docx]

**
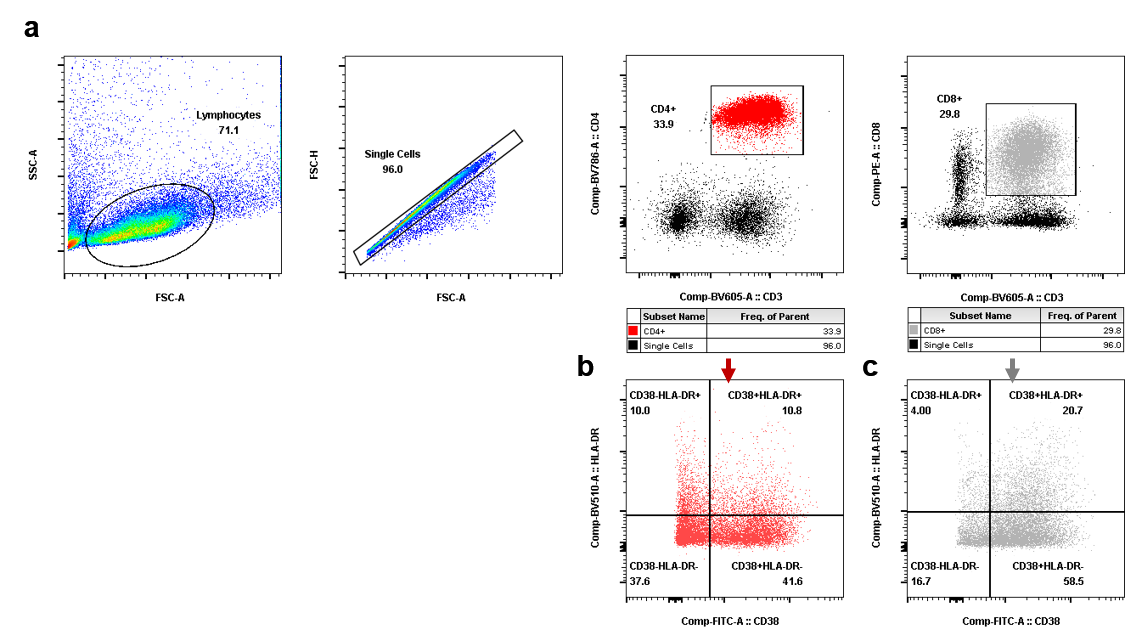
**

**Supplementary Figure 1. Gating for activated T cell populations by flow cytometry. a**, gating for CD4+ T cells (red dot plot in rectangle) and CD8+ T cells (grey dot plot in rectangle). **b**-**c**, gating for activated CD4+ T-cell subsets **b** and activated CD8+ T-cell subsets **c** with CD38 and/or HLA-DR expression.


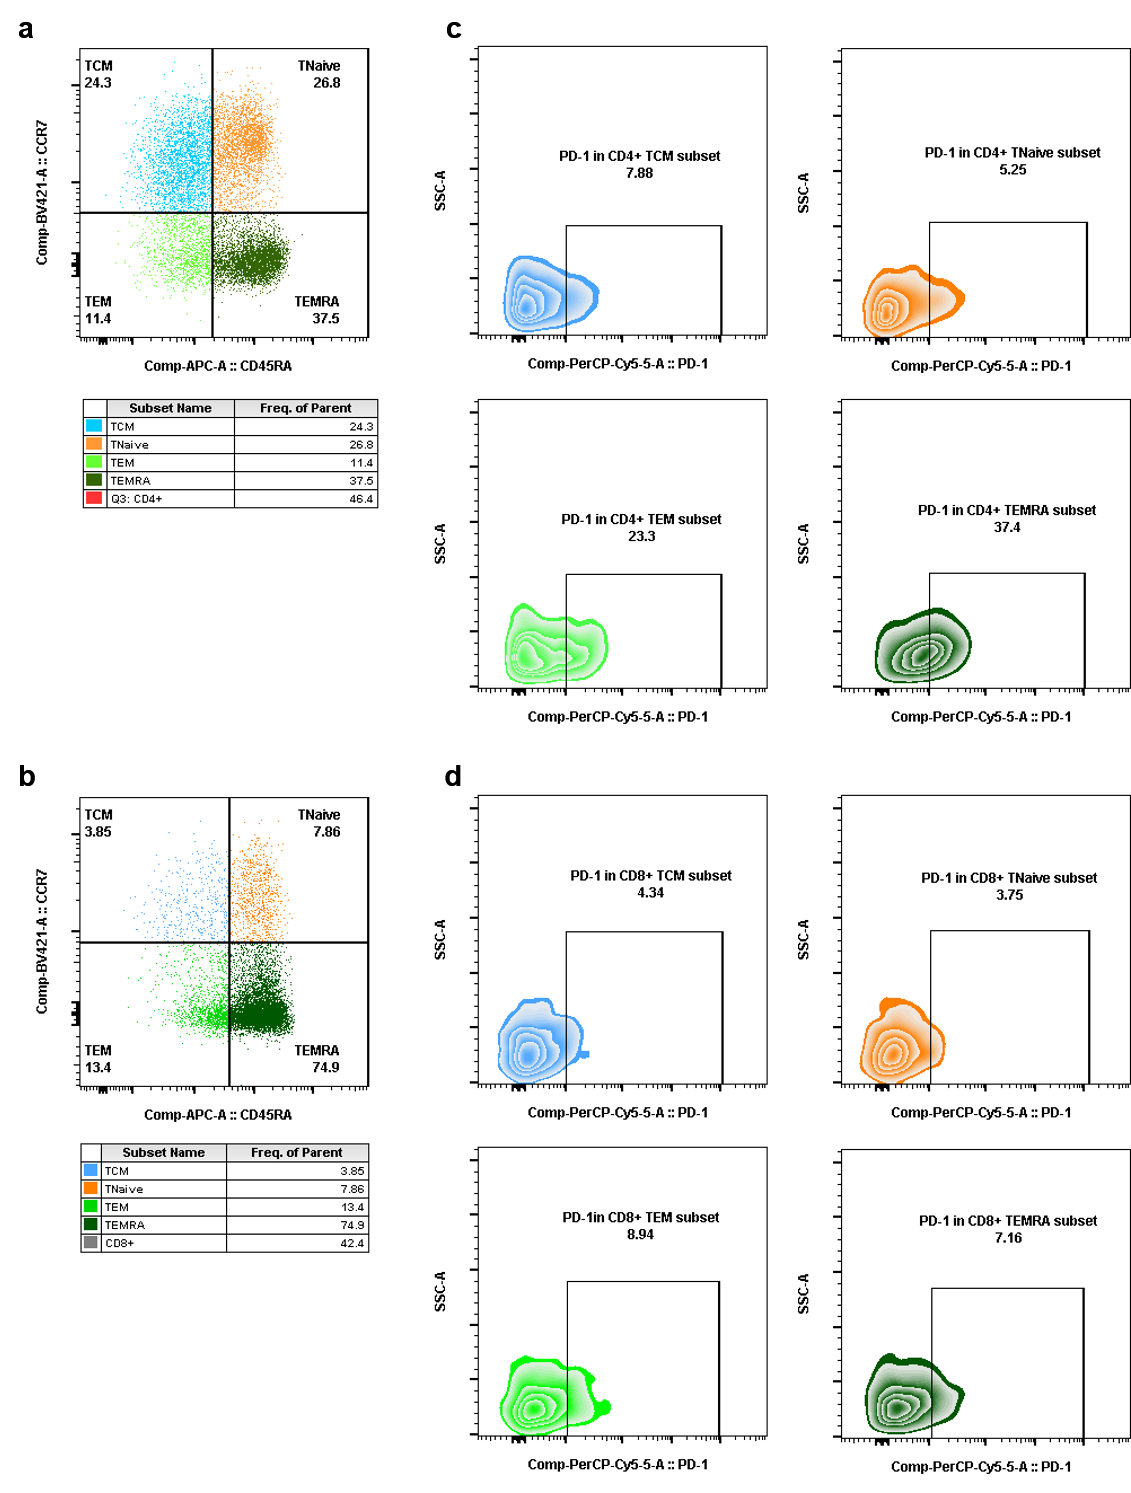


**Supplementary Figure 2. Gating for memory T-cell subsets and PD-1+ cells in memory T-cell subsets by flow cytometry. a-b**, gating for CD4+ memory T-cell subsets **a** and CD8+ memory T-cell subsets **b** with CCR7 and CD45RA expression (TCM, CD4+/CD8+ CCR7+ CD45RA-, blue dot plot; TNaïve, CD4+/CD8+ CCR7+ CD45RA+, orange dot plot; TEM, CD4+/CD8+ CCR7- CD45RA-, light green dot plot; TEMRA, CD4+/CD8+ CCR7- CD45RA+, dark green dot plot). **c-d**, gating for PD-1+ cells in CD4+ memory T-cell subsets **c** and PD-1+ cells in CD8+ memory T-cell subsets **d** (PD-1+ TCM, CD4+/CD8+ PD-1+ CCR7+ CD45RA-, blue zebra plot; PD-1+ TNaïve, CD4+/CD8+ PD-1+ CCR7+CD45RA+, orange zebra plot; PD-1+ TEM, CD4+/CD8+ PD-1+ CCR7-CD45RA-, light green zebra plot; PD-1+ TEMRA, CD4+/CD8+ PD-1+ CCR7-CD45RA+, dark green zebra plot)


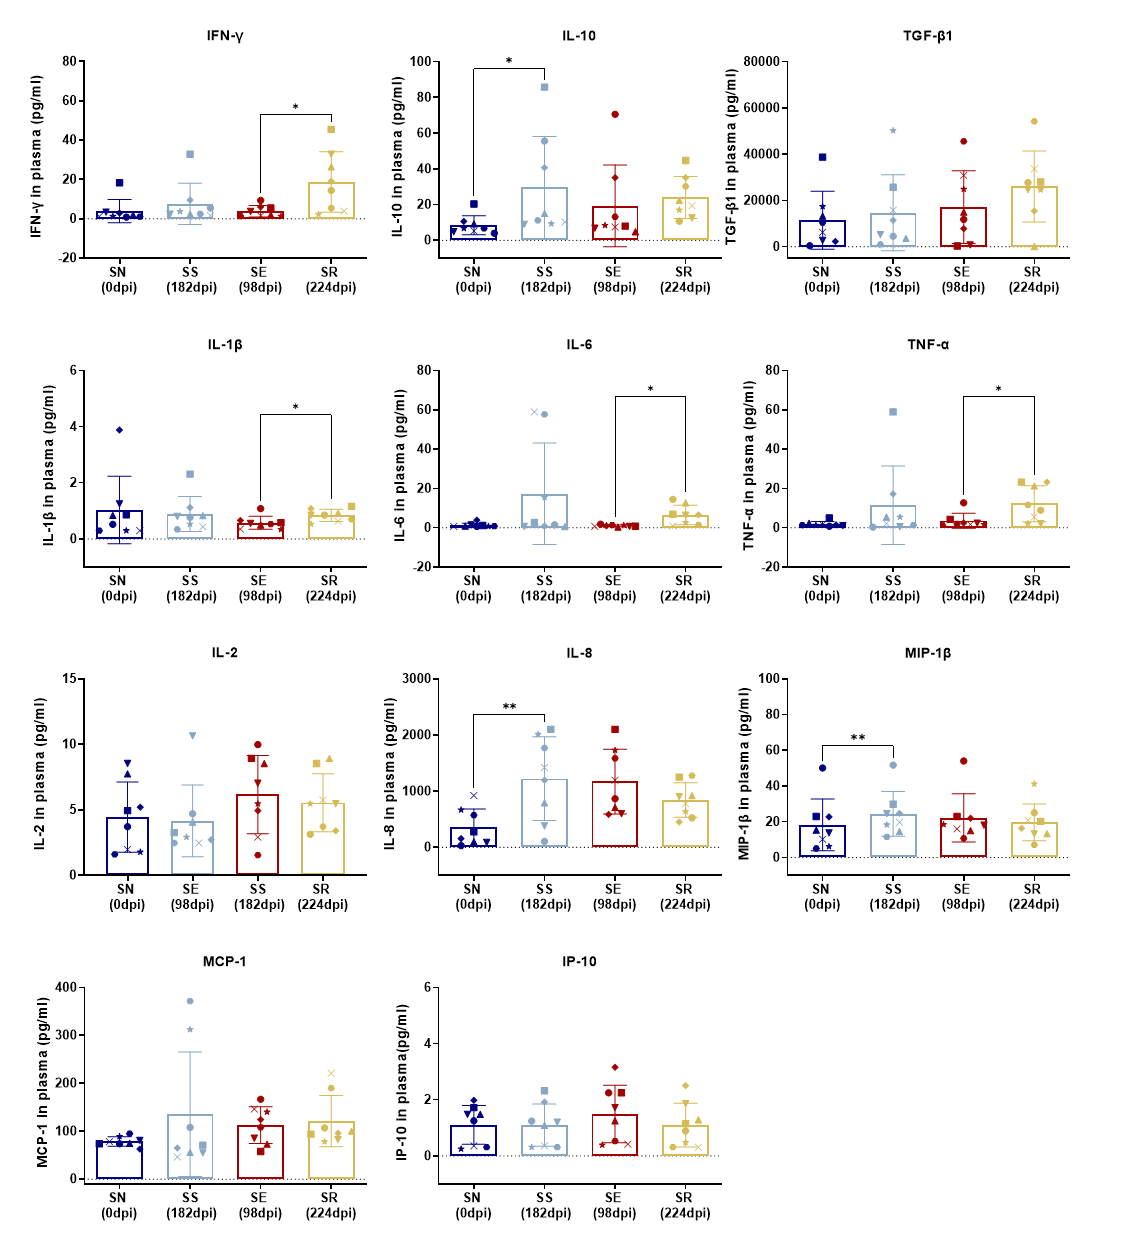


**Supplementary Figure 3. Comparison of cytokines between SS and SN, and between SR and SE.** Cytokines were detected in serum of SIV-infected macaques at the indicated phase. Levels (pg/ml) of IFN-γ, IL-10, TGF-β1, IL-1β, IL-6, TNF-α, IL-2, IL-8, MIP-1β, MCP-1 and IP-10 were measured and assessed by paired *t*-test in SS vs SN and SR vs SE. Data shown are the mean ± SD from three independent experiments. (* *p* < 0.05, ** *p* < 0.01)
